# Supplementary material for: Isolation of Nocuolin A and Synthesis of New Oxadiazine Derivatives. Design, Synthesis, Molecular Docking, Apoptotic Evaluation, and Cathepsin B Inhibition
Source: MDPI journal article supplement (doi:10.3390/md21050284), 2023-04-29
Supplement: s1 [file s1]

## Supplementary Materials

### Isolation of Nocuoilin A and synthesis of new oxadiazine derivatives. Design, synthesis, molecular docking, apoptotic evaluation and cathepsin B inhibition

Víctor Tena Pérez<sup>1</sup>, Luis Apaza Ticona<sup>1,2,\*</sup>, Alfredo H. Cabanillas<sup>1</sup>, Santiago Maderuelo Corral<sup>3</sup>, Diego Fernando Rosero Valencia<sup>3</sup>, Antera Martel Quintana<sup>4</sup>, Montserrat Ortega Domenech<sup>3</sup>, Ángel Rumbero Sánchez<sup>1,\*</sup>

#### Affiliation

1. Department of Organic Chemistry, Faculty of Sciences, University Autónoma of Madrid, Cantoblanco, 28049 Madrid, Spain
2. Organic Chemistry Unit, Department of Chemistry in Pharmaceutical Sciences, Faculty of Pharmacy, University Complutense of Madrid, Plza. Ramón y Cajal s/n, 28040 Madrid, Spain
3. VALORALIA I MÁS D, SL, Tres Cantos, 28760 Madrid, Spain
4. Spanish Bank of Algas, Institute of Oceanography and Global Change (IOCAG) University of Las Palmas de Gran Canarias, Muelle de Taliarte s/n, 35214 Telde, Canary Islands, Spain

#### \*Correspondence:

[lnapaza@ucm.es](mailto:lnapaza@ucm.es) (L.A.T). Organic Chemistry Unit, Department of Chemistry in Pharmaceutical Sciences, Faculty of Pharmacy, University Complutense of Madrid. Plza. Ramón y Cajal s/n, 28040 Madrid, Spain. ORCID: 0000-0002-7135-3909

[angel.rumbero@uam.es](mailto:angel.rumbero@uam.es) (A.R.S). Department of Organic Chemistry, Faculty of Sciences, University Autónoma of Madrid. Cantoblanco, 28049 Madrid, Spain

## Contents:

- Structural elucidation of 1-[(6*R*)-5,6-Dihydro-4,6-dipentyl-2*H*-1,2,3-oxadiazin-2-yl]-3-hydroxypropan-1-one (**1**).
- **Table S1.** <sup>1</sup>H-<sup>1</sup>H COSY, <sup>1</sup>H-<sup>13</sup>C HSQC-TOCSY connectivity and most representatives <sup>1</sup>H-<sup>13</sup>C HMBC connectivity for 1-[(6*R*)-5,6-Dihydro-4,6-dipentyl-2*H*-1,2,3-oxadiazin-2-yl]-3-hydroxypropan-1-one (**1**).
- **Figure S1.** HRESIMS spectrum of 1-[(6*R*)-5,6-Dihydro-4,6-dipentyl-2*H*-1,2,3-oxadiazin-2-yl]-3-hydroxypropan-1-one (**1**).
- **Figure S2.** <sup>1</sup>H NMR spectrum of 1-[(6*R*)-5,6-Dihydro-4,6-dipentyl-2*H*-1,2,3-oxadiazin-2-yl]-3-hydroxypropan-1-one (**1**) in DMSO 500 MHz.
- **Figure S3.** <sup>13</sup>C NMR spectrum of 1-[(6*R*)-5,6-Dihydro-4,6-dipentyl-2*H*-1,2,3-oxadiazin-2-yl]-3-hydroxypropan-1-one (**1**) in DMSO 175 MHz.
- **Figure S4.** DEPT-135 spectrum of 1-[(6*R*)-5,6-Dihydro-4,6-dipentyl-2*H*-1,2,3-oxadiazin-2-yl]-3-hydroxypropan-1-one (**1**) in DMSO 175 MHz.
- **Figure S5.** <sup>1</sup>H-<sup>1</sup>H COSY spectrum of 1-[(6*R*)-5,6-Dihydro-4,6-dipentyl-2*H*-1,2,3-oxadiazin-2-yl]-3-hydroxypropan-1-one (**1**) in DMSO.
- **Figure S6.** <sup>1</sup>H-<sup>13</sup>C HSQC spectrum of 1-[(6*R*)-5,6-Dihydro-4,6-dipentyl-2*H*-1,2,3-oxadiazin-2-yl]-3-hydroxypropan-1-one (**1**) in DMSO.
- **Figure S7.** <sup>1</sup>H-<sup>13</sup>C HMBC spectrum of 1-[(6*R*)-5,6-Dihydro-4,6-dipentyl-2*H*-1,2,3-oxadiazin-2-yl]-3-hydroxypropan-1-one (**1**) in DMSO.
- **Figure S8.** <sup>1</sup>H-<sup>15</sup>N HMBC spectrum of 1-[(6*R*)-5,6-Dihydro-4,6-dipentyl-2*H*-1,2,3-oxadiazin-2-yl]-3-hydroxypropan-1-one (**1**) in DMSO.
- **Figure S9.** <sup>1</sup>H NMR spectrum of 1-[(6*R*)-5,6-Dihydro-4,6-dipentyl-2*H*-1,2,3-oxadiazin-2-yl]-3-hydroxypropan-1-one (**1**) in CDCl<sub>3</sub> 500 MHz.
- **Figure S10.** <sup>13</sup>C NMR spectrum of 1-[(6*R*)-5,6-Dihydro-4,6-dipentyl-2*H*-1,2,3-oxadiazin-2-yl]-3-hydroxypropan-1-one (**1**) in CDCl<sub>3</sub> 175 MHz.
- **Figure S11.** DEPT-135 spectrum of 1-[(6*R*)-5,6-Dihydro-4,6-dipentyl-2*H*-1,2,3-oxadiazin-2-yl]-3-hydroxypropan-1-one (**1**) in CDCl<sub>3</sub> 175 MHz.
- **Figure S12.** <sup>1</sup>H-<sup>1</sup>H COSY spectrum of 1-[(6*R*)-5,6-Dihydro-4,6-dipentyl-2*H*-1,2,3-oxadiazin-2-yl]-3-hydroxypropan-1-one (**1**) in CDCl<sub>3</sub>.
- **Figure S13.** <sup>1</sup>H-<sup>13</sup>C HSQC spectrum of 1-[(6*R*)-5,6-Dihydro-4,6-dipentyl-2*H*-1,2,3-oxadiazin-2-yl]-3-hydroxypropan-1-one (**1**) in CDCl<sub>3</sub>.
- **Figure S14.** <sup>1</sup>H-<sup>13</sup>C HMBC spectrum of 1-[(6*R*)-5,6-Dihydro-4,6-dipentyl-2*H*-1,2,3-oxadiazin-2-yl]-3-hydroxypropan-1-one (**1**) in CDCl<sub>3</sub>.
- **Figure S15.** <sup>1</sup>H-<sup>13</sup>C HSQC-TOCSY spectrum of 1-[(6*R*)-5,6-Dihydro-4,6-dipentyl-2*H*-1,2,3-oxadiazin-2-yl]-3-hydroxypropan-1-one (**1**) in CDCl<sub>3</sub>.
- **Figure S16.** <sup>1</sup>H-<sup>15</sup>N HMBC spectrum of 1-[(6*R*)-5,6-Dihydro-4,6-dipentyl-2*H*-1,2,3-oxadiazin-2-yl]-3-hydroxypropan-1-one (**1**) in CDCl<sub>3</sub>.
- **Figure S17.** HRESIMS spectrum of 3-[(6*R*)-5,6-Dihydro-4,6-dipentyl-2*H*-1,2,3-oxadiazin-2-yl]-3-oxopropyl acetate (**2**).
- **Figure S18.** <sup>1</sup>H NMR spectrum of 3-[(6*R*)-5,6-Dihydro-4,6-dipentyl-2*H*-1,2,3-oxadiazin-2-yl]-3-oxopropyl acetate (**2**) in CDCl<sub>3</sub> 300 MHz.
- **Figure S19.** <sup>13</sup>C NMR spectrum of 3-[(6*R*)-5,6-Dihydro-4,6-dipentyl-2*H*-1,2,3-oxadiazin-2-yl]-3-oxopropyl acetate (**2**) in CDCl<sub>3</sub> 75 MHz.
- **Figure S20.** DEPT-135 spectrum of 3-[(6*R*)-5,6-Dihydro-4,6-dipentyl-2*H*-1,2,3-oxadiazin-2-yl]-3-oxopropyl acetate (**2**) in CDCl<sub>3</sub> 75 MHz.
- **Figure S21.** HRESIMS spectrum of 4-{3-[(6*R*)-5,6-Dihydro-4,6-dipentyl-2*H*-1,2,3-oxadiazin-2-yl]-3-oxopropoxy}-4-oxobutanoic acid (**3**).
- **Figure S22.** <sup>1</sup>H NMR spectrum of 4-{3-[(6*R*)-5,6-Dihydro-4,6-dipentyl-2*H*-1,2,3-oxadiazin-2-yl]-3-oxopropoxy}-4-oxobutanoic acid (**3**) in CDCl<sub>3</sub> 300 MHz.

- **Figure S23.**  $^{13}\text{C}$  NMR spectrum of 4-{3-[(6*R*)-5,6-Dihydro-4,6-dipentyl-2*H*-1,2,3-oxadiazin-2-yl]-3-oxopropoxy}-4-oxobutanoic acid (**3**) in  $\text{CDCl}_3$  75 MHz.
- **Figure S24.** DEPT-135 spectrum of 4-{3-[(6*R*)-5,6-Dihydro-4,6-dipentyl-2*H*-1,2,3-oxadiazin-2-yl]-3-oxopropoxy}-4-oxobutanoic acid (**3**) in  $\text{CDCl}_3$  75 MHz.
- **Figure S25.**  $^1\text{H}$ - $^1\text{H}$  COSY spectrum of 4-{3-[(6*R*)-5,6-Dihydro-4,6-dipentyl-2*H*-1,2,3-oxadiazin-2-yl]-3-oxopropoxy}-4-oxobutanoic acid (**3**) in  $\text{CDCl}_3$ .
- **Figure S26.**  $^1\text{H}$ - $^{13}\text{C}$  HSQC spectrum of 4-{3-[(6*R*)-5,6-Dihydro-4,6-dipentyl-2*H*-1,2,3-oxadiazin-2-yl]-3-oxopropoxy}-4-oxobutanoic acid (**3**) in  $\text{CDCl}_3$ .
- **Figure S27.**  $^1\text{H}$ - $^{13}\text{C}$  HMBC spectrum of 4-{3-[(6*R*)-5,6-Dihydro-4,6-dipentyl-2*H*-1,2,3-oxadiazin-2-yl]-3-oxopropoxy}-4-oxobutanoic acid (**3**) in  $\text{CDCl}_3$ .

- Structural elucidation of 1-[(6R)-5,6-Dihydro-4,6-dipentyl-2H-1,2,3-oxadiazin-2-yl]-3-hydroxypropan-1-one (**1**).

Compound **1** was isolated as a colourless viscous oil, with  $C_{16}H_{30}N_2O_3$  as a molecular formula based on the  $[M + Na]^+$  ion peak at  $m/z$  321.2152 (calcd. for  $C_{16}H_{30}NaN_2O_3$  321.2149) obtained by HRESIMS (Figure S1).  $^1H$  NMR (Figure S2) in  $DMSO-d_6$  showed the presence of the hydroxyl proton at  $\delta_H$  4.57 (t,  $J = 5.4$  Hz) which coupled by a  $^1H$ - $^1H$  COSY correlation with methylene protons at  $\delta_H$  3.66 (td,  $J = 6.6$  and  $5.4$  Hz, H-3'') and  $\delta_C$  57.4 determined by  $^{13}C$  NMR (Figure S3) and DEPT-135 (Figure S4) spectra. The  $^1H$ - $^1H$  COSY (Figure S5) and  $^1H$ - $^{13}C$  HSQC (Figure S6) spectra showed that the methylene  $CH_2$ -3'' was correlated with the methylene  $CH_2$ -2'' at  $\delta_H$  2.69 (t,  $J = 6.6$  Hz, 1H, Ha-2''), 2.68 (t,  $J = 6.6$  Hz, 1H, Hb-2'') and  $\delta_C$  37.3. The methylene  $CH_2$ -2'' and  $CH_2$ -3'' of spin system A were interconnected to the quaternary carbon at  $\delta_C$  165.6 (C-1'') as shown by the  $^1H$ - $^{13}C$  HMBC spectrum (Figure S7) which suggested an amide bond (N-CO- $CH_2$ - $CH_2$ OH). Other two spin systems in the  $^1H$  NMR spectrum could be identified in the  $^1H$ - $^1H$  COSY,  $^1H$ - $^{13}C$  HSQC and  $^1H$ - $^{13}C$  HMBC spectra as follows:  $CH_3$ - $CH_2$ - $CH_2$ - $CH_2$ - $CH_2$  (C-1'/C-5', spin system B) and  $CH_3$ - $CH_2$ - $CH_2$ - $CH_2$ - $CH_2$ -CHR- $CH_2$  (C-5/C-11, spin system C). The spin system B and C were seen as interconnected via attachment to the quaternary carbon at  $\delta_C$  150.2 (C-4) by  $^1H$ - $^{13}C$  HMBC correlations between C-4 with methylene protons H-5 at  $\delta_H$  2.39 (dd,  $J = 18.3$  and  $3.8$  Hz, H-5a), 2.17 (dd,  $J = 18.3$  and  $8.8$  Hz, H-5b) and with methylene protons H-1' at  $\delta_H$  2.23 (t,  $J = 7.3$  Hz, H-1'a), 2.22 (t,  $J = 7.3$  Hz, H-1'b). The correlation between H-1' with a nitrogen atom at  $\delta_N$  302.6 which was observed in the  $^1H$ - $^{15}N$  HMBC (Figure S8) showed the presence of an imine bond between C-4 and N-3 atoms. Finally, the signals at  $\delta_H$  4.00 (dddd,  $J = 8.8, 7.8, 4.8$  and  $3.8$  Hz) and  $\delta_C$  75.3 were assigned to methane oxygenated CH-6, using the  $^1H$ - $^1H$  COSY correlations with methylene protons  $CH_2$ -5 and  $CH_2$ -7 at  $\delta_H$  1.54 (m, H-7a), 1.48 (m, H-7b) and  $\delta_C$  33.7 (C-7). All assignments of  $^1H$  and  $^{13}C$  NMR in  $DMSO-d_6$  of the compound are shown in Table S1.

- **Table S1.**  $^1H$ - $^1H$  COSY,  $^1H$ - $^{13}C$  HSQC-TOCSY connectivity and most representatives  $^1H$ - $^{13}C$  HMBC connectivity for 1-[(6R)-5,6-Dihydro-4,6-dipentyl-2H-1,2,3-oxadiazin-2-yl]-3-hydroxypropan-1-one (**1**) in  $DMSO-d_6$ .

| No  | $\delta_C$ , DEPT-135 | $\delta_H$ , m (J, Hz)                          | $^1H$ - $^1H$ COSY | $^1H$ - $^{13}C$ HMBC |
|-----|-----------------------|-------------------------------------------------|--------------------|-----------------------|
| 4   | 150.8                 |                                                 |                    | 5, 1'                 |
| 5   | 31.5, $CH_2$          | 2.39, dd (18.3, 3.8)<br>2.17, dd (18.3, 8.8)    | 5, 6<br>5, 6       | 4, 6, 7<br>4, 6, 7    |
| 6   | 75.3, CH              | 4.00, dddd (8.8, 7.8, 4.8, 3.8)                 | 5, 7               | 5                     |
| 7   | 33.7, $CH_2$          | 1.54, m<br>1.48, m                              | 6, 8               | 5                     |
| 8   | 24.3, $CH_2$          | 1.47, m<br>1.36, m                              | 9, 7               |                       |
| 9   | 31.5, $CH_2$          | 1.27, m                                         | 8, 10              | 11                    |
| 10  | 22.6, $CH_2$          | 1.30, m                                         | 9, 11              | 11                    |
| 11  | 14.3, $CH_3$          | 0.87, t (6.8)<br>2.23, t (7.3)<br>2.22, t (7.3) | 10                 | 9, 10                 |
| 1'  | 36.3, $CH_2$          |                                                 | 2'                 | 4, 2'                 |
| 2'  | 25.3, $CH_2$          | 1.53, m                                         | 1', 3'             | 1'                    |
| 3'  | 31.2, $CH_2$          | 1.29, m                                         | 2', 4'             | 5'                    |
| 4'  | 22.4, $CH_2$          | 1.30, m                                         | 3', 5'             | 5'                    |
| 5'  | 14.3, $CH_3$          | 0.88, t (7.3)                                   | 4'                 | 3', 4'                |
| 1'' | 165.6                 |                                                 |                    | 2'', 3''              |
| 2'' | 37.3, $CH_2$          | 2.69, m (6.6)<br>2.68, m (6.6)                  | 3''                | 1'', 3'', OH          |
| 3'' | 57.4, $CH_2$          | 3.66, td (6.6, 5.4)                             | 2'', OH            | 1'', 2'', OH          |
| OH  |                       | 4.57, t (5.4)                                   | 3''                | 2'', 3''              |

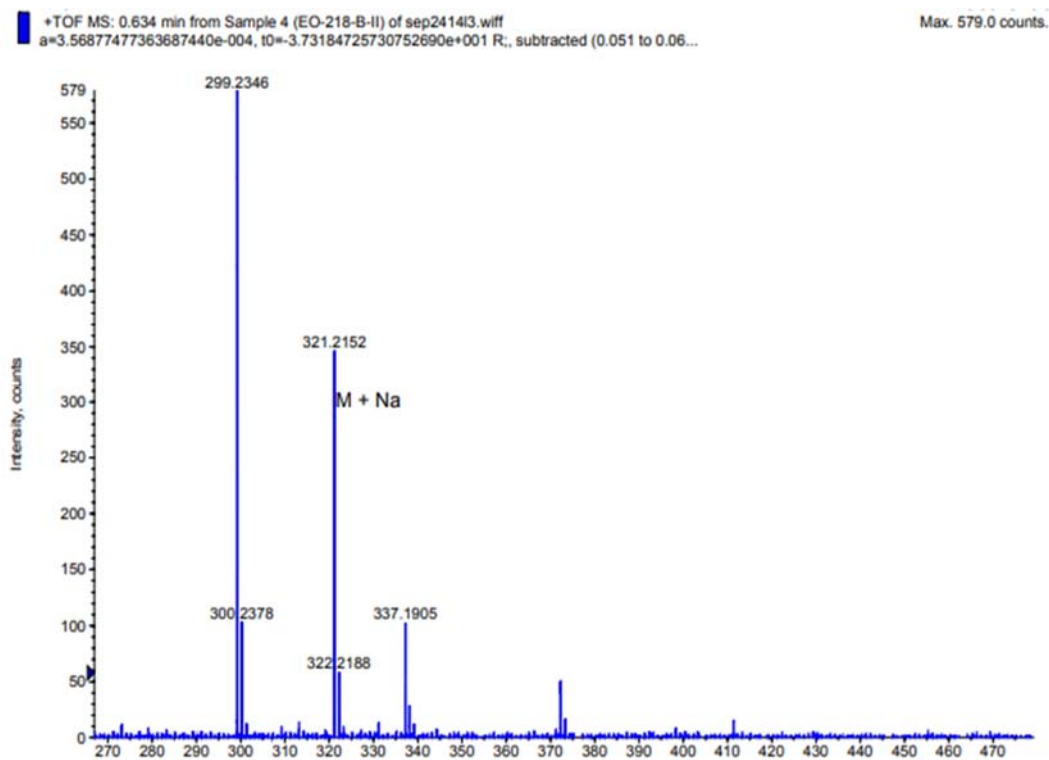

- **Figure S1.** HRESIMS spectrum of 1-[(6*R*)-5,6-Dihydro-4,6-dipentyl-2*H*-1,2,3-oxadiazin-2-yl]-3-hydroxypropan-1-one (**1**).

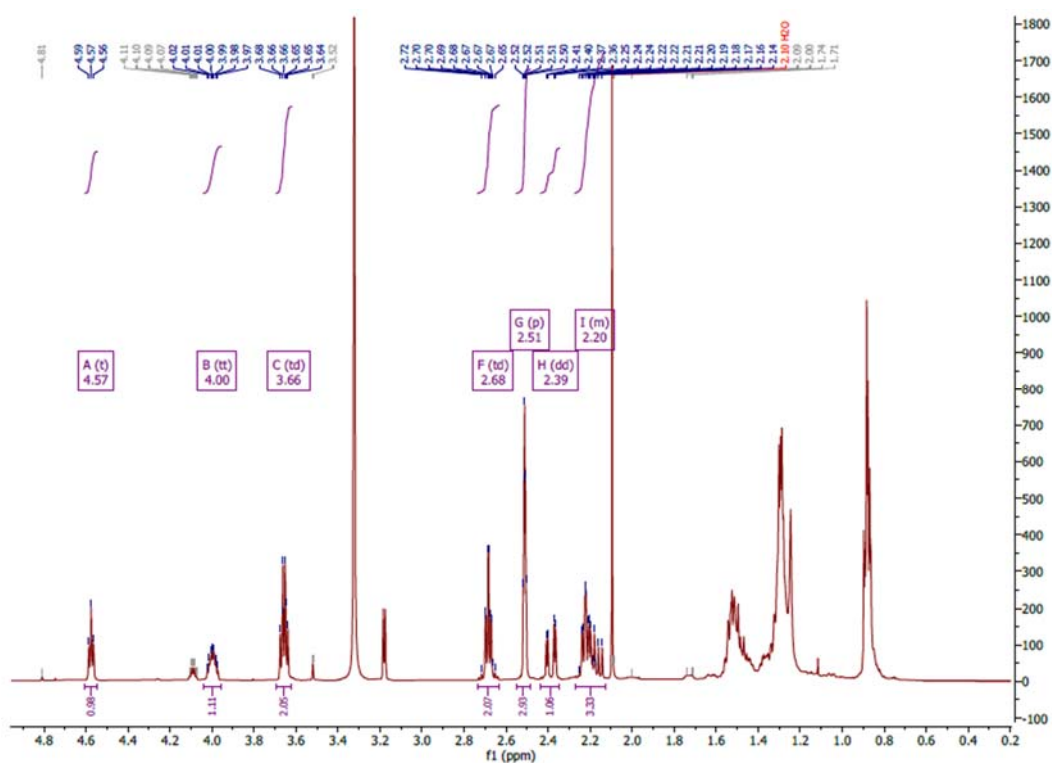

- **Figure S2.** <sup>1</sup>H NMR spectrum of 1-[(6*R*)-5,6-Dihydro-4,6-dipentyl-2*H*-1,2,3-oxadiazin-2-yl]-3-hydroxypropan-1-one (**1**) in DMSO 500 MHz.

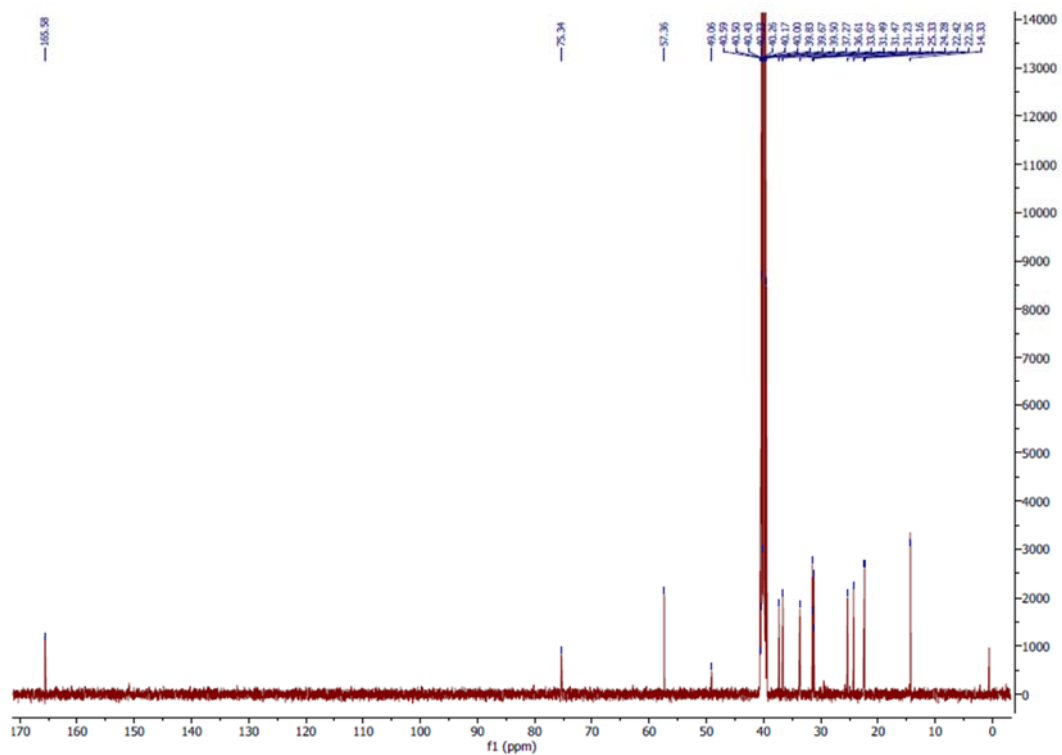

- **Figure S3.**  $^{13}\text{C}$  NMR spectrum of 1-[(6R)-5,6-Dihydro-4,6-dipentyl-2H-1,2,3-oxadiazin-2-yl]-3-hydroxypropan-1-one (**1**) in DMSO 175 MHz.

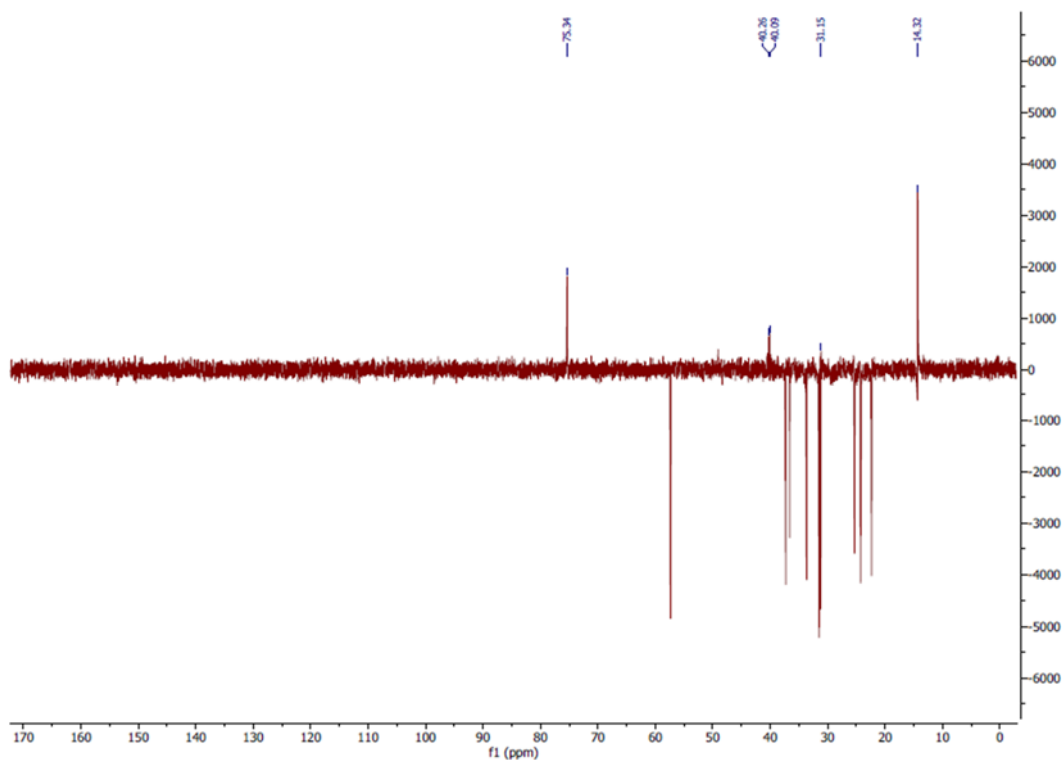

- **Figure S4.** DEPT-135 spectrum of 1-[(6R)-5,6-Dihydro-4,6-dipentyl-2H-1,2,3-oxadiazin-2-yl]-3-hydroxypropan-1-one (**1**) in DMSO 175 MHz.

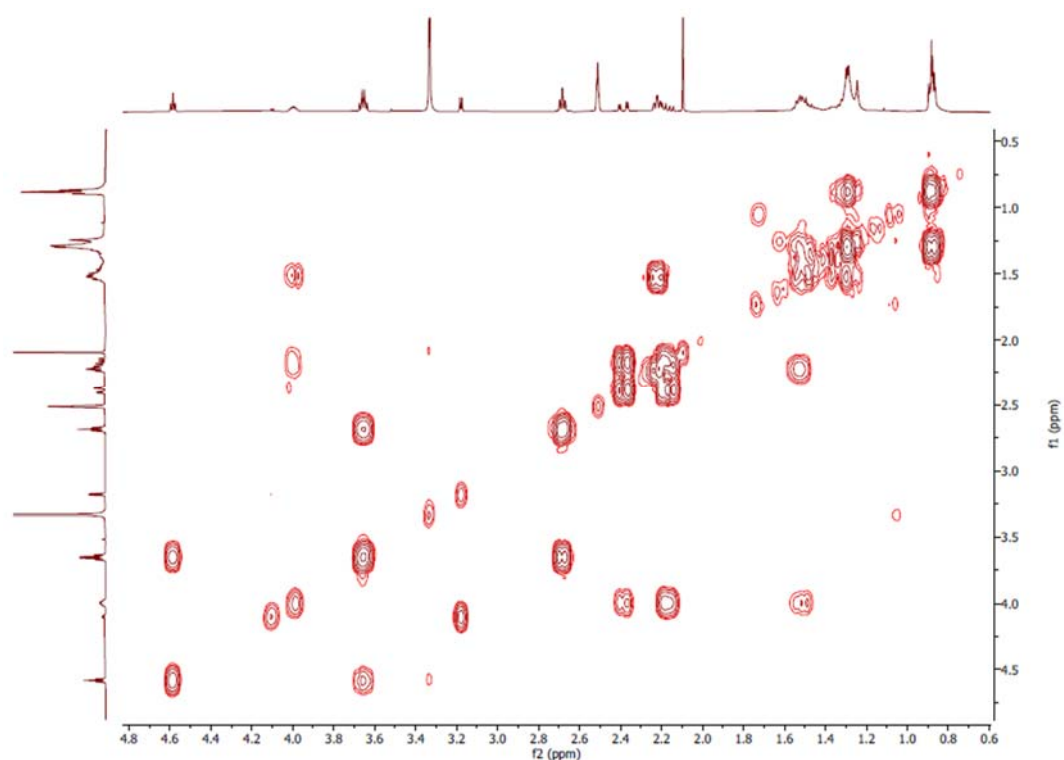

- **Figure S5.**  $^1\text{H}$ - $^1\text{H}$  COSY spectrum of 1-[(6*R*)-5,6-Dihydro-4,6-dipentyl-2*H*-1,2,3-oxadiazin-2-yl]-3-hydroxypropan-1-one (**1**) in DMSO.

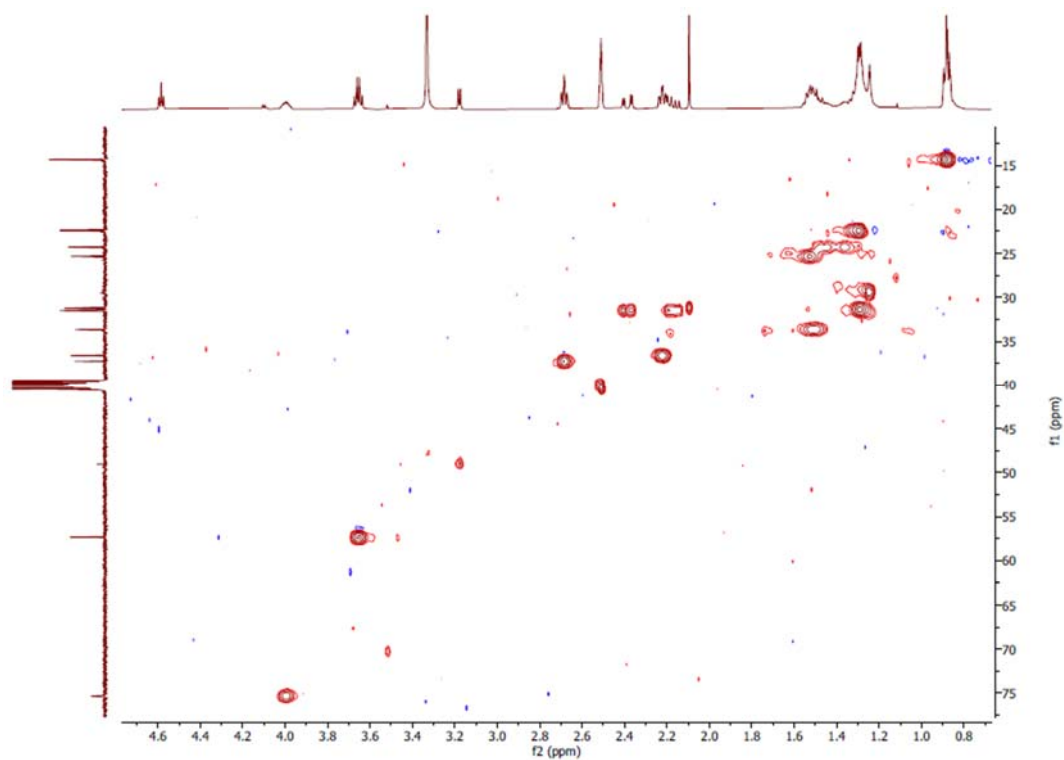

- **Figure S6.**  $^1\text{H}$ - $^{13}\text{C}$  HSQC spectrum of 1-[(6*R*)-5,6-Dihydro-4,6-dipentyl-2*H*-1,2,3-oxadiazin-2-yl]-3-hydroxypropan-1-one (**1**) in DMSO.

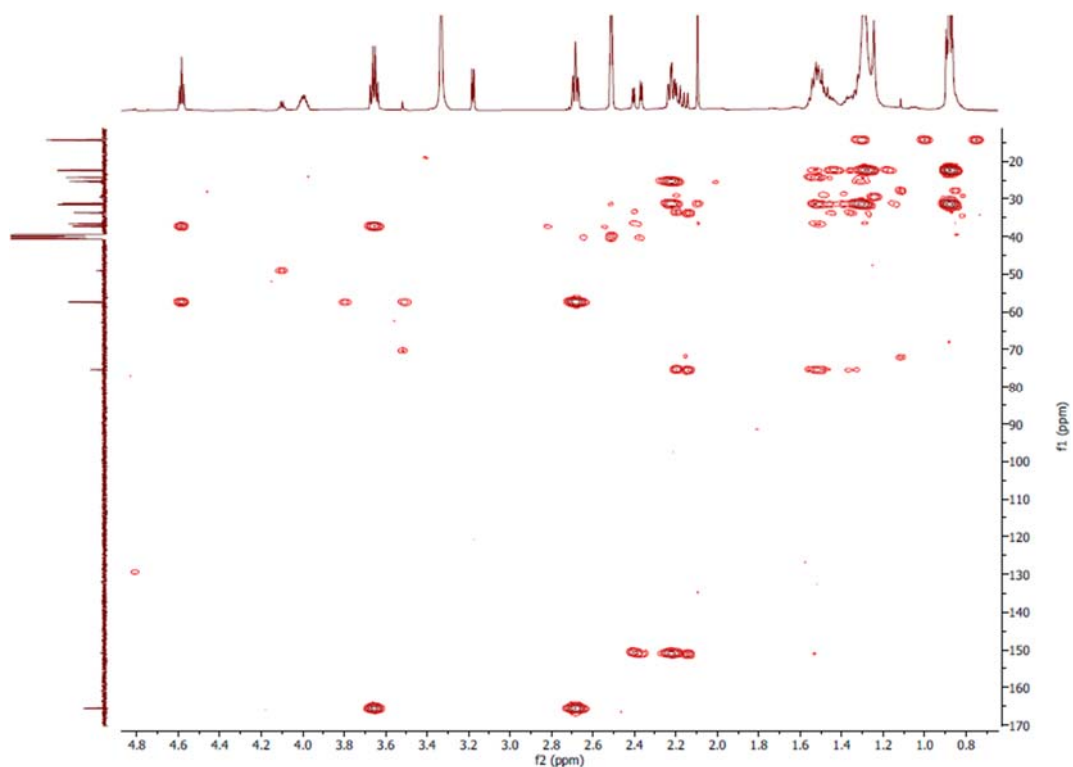

- **Figure S7.**  $^1\text{H}$ - $^{13}\text{C}$  HMBC spectrum of 1-[(6*R*)-5,6-Dihydro-4,6-dipentyl-2*H*-1,2,3-oxadiazin-2-yl]-3-hydroxypropan-1-one (**1**) in DMSO.

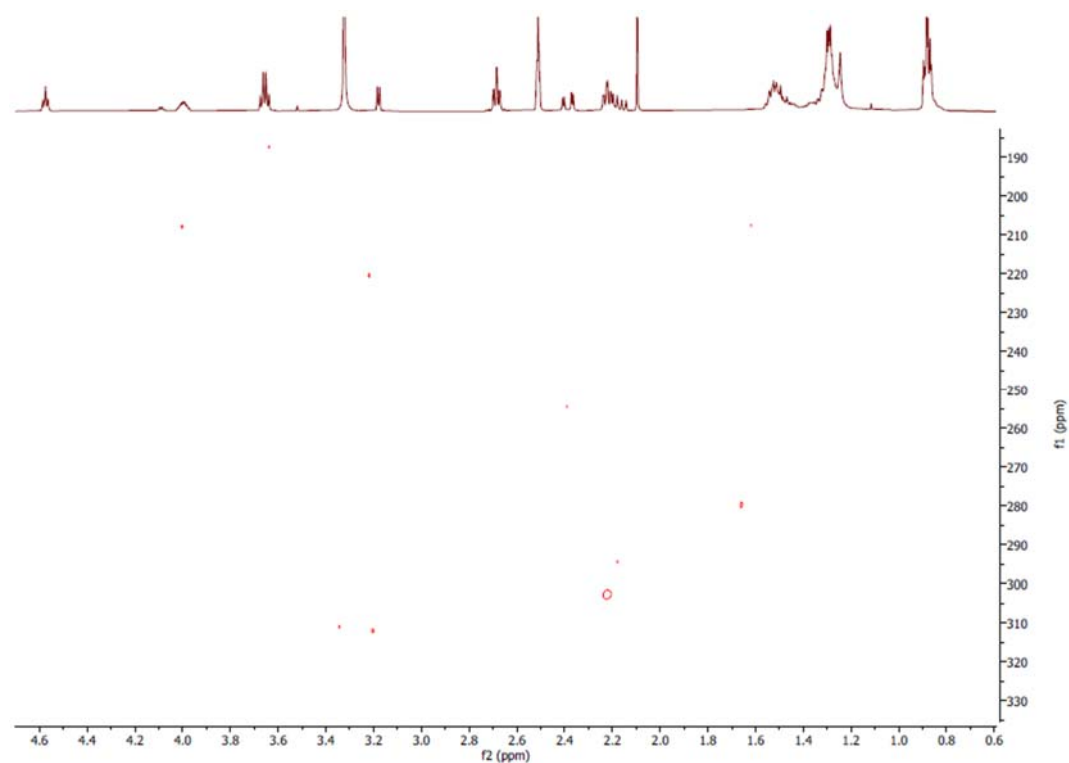

- **Figure S8.**  $^1\text{H}$ - $^{15}\text{N}$  HMBC spectrum of 1-[(6*R*)-5,6-Dihydro-4,6-dipentyl-2*H*-1,2,3-oxadiazin-2-yl]-3-hydroxypropan-1-one (**1**) in DMSO.



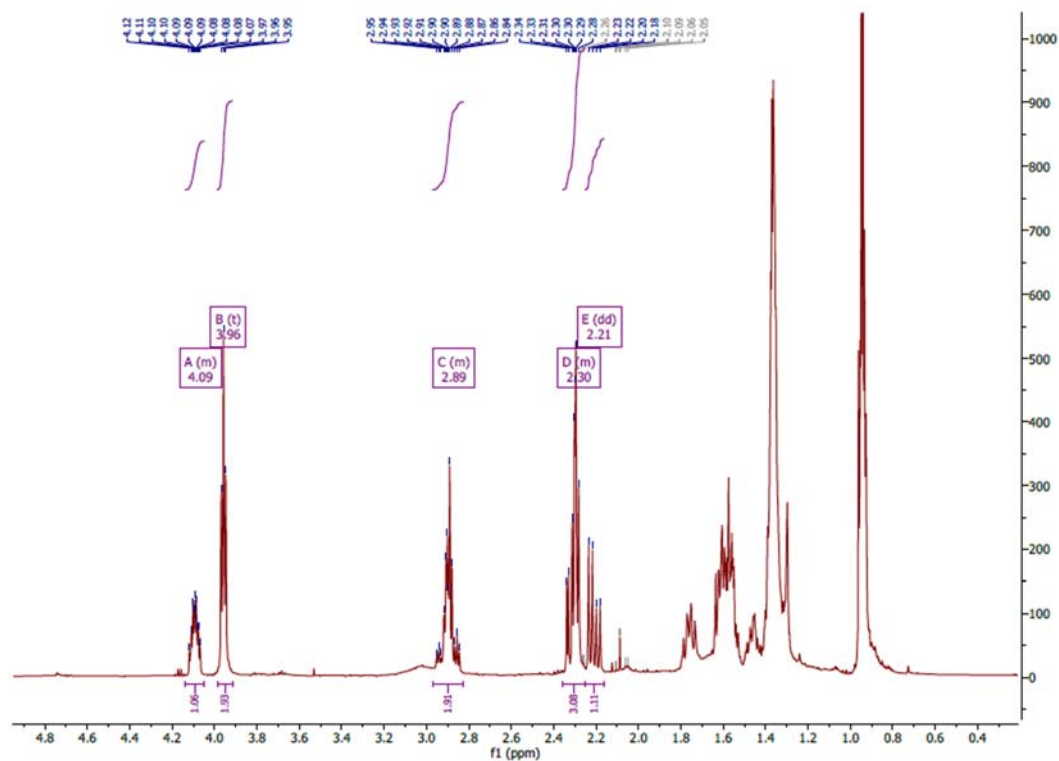

- **Figure S9.** <sup>1</sup>H NMR spectrum of 1-[(6R)-5,6-Dihydro-4,6-dipentyl-2H-1,2,3-oxadiazin-2-yl]-3-hydroxypropan-1-one (**1**) in CDCl<sub>3</sub> 500 MHz.

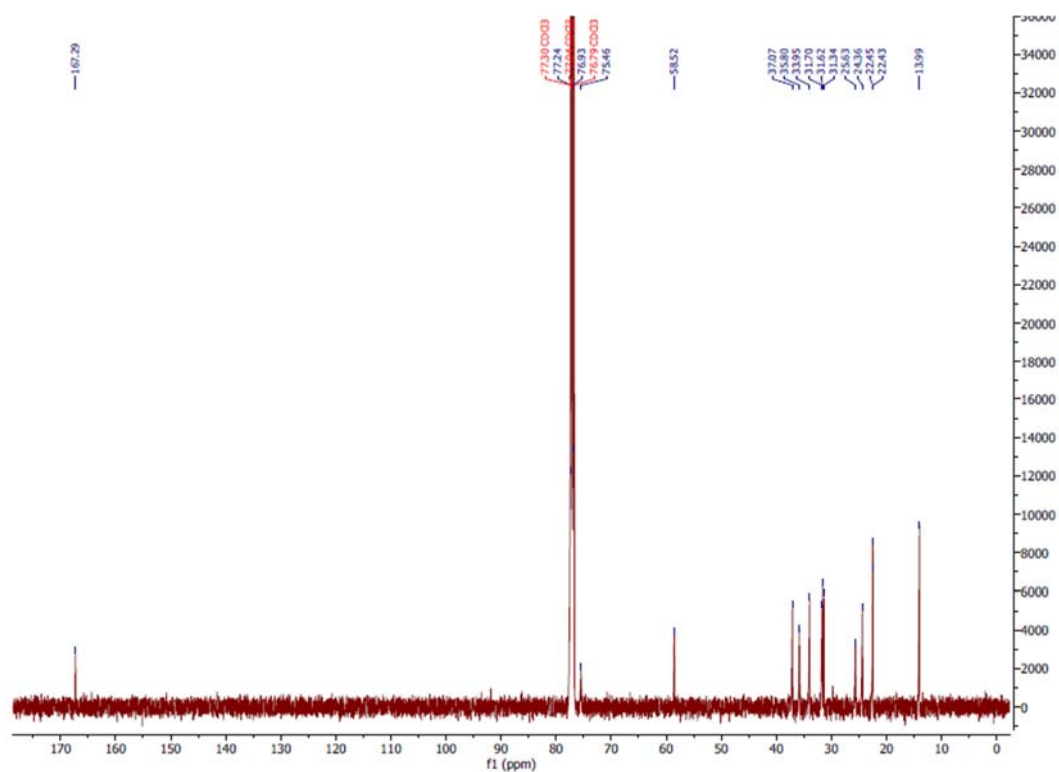

- **Figure S10.** <sup>13</sup>C NMR spectrum of 1-[(6R)-5,6-Dihydro-4,6-dipentyl-2H-1,2,3-oxadiazin-2-yl]-3-hydroxypropan-1-one (**1**) in CDCl<sub>3</sub> 175 MHz.

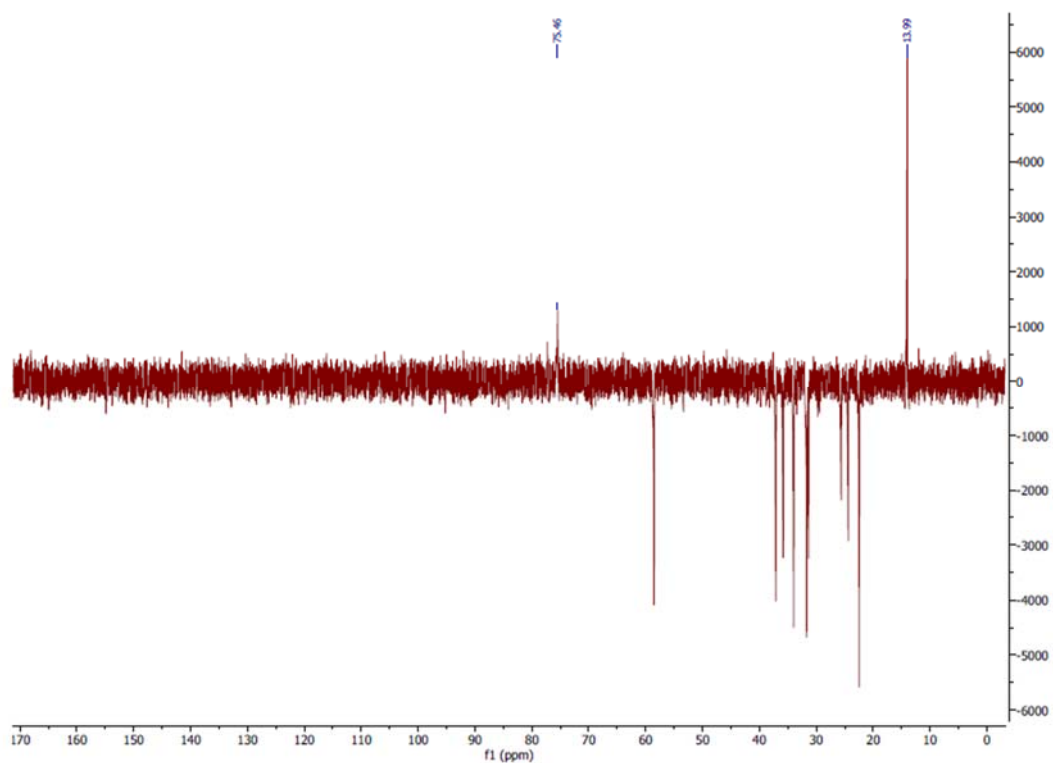

- **Figure S11.** DEPT-135 spectrum of 1-[(6*R*)-5,6-Dihydro-4,6-dipentyl-2*H*-1,2,3-oxadiazin-2-yl]-3-hydroxypropan-1-one (**1**) in CDCl<sub>3</sub> 175 MHz.

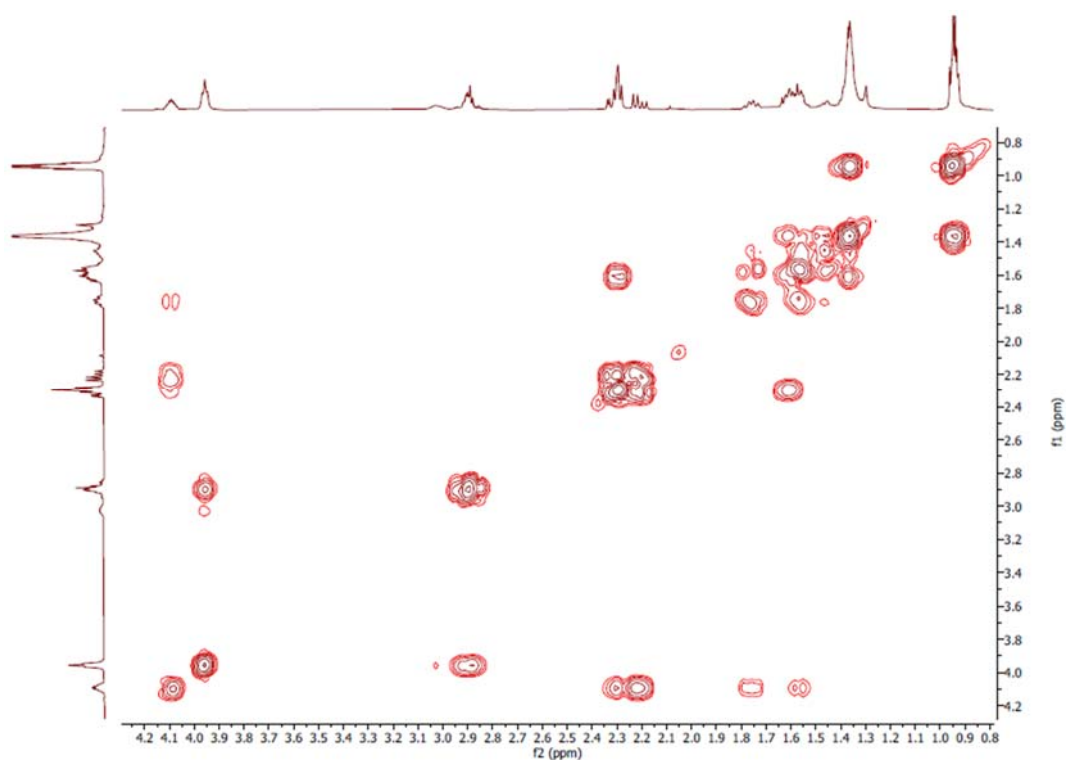

- **Figure S12.** <sup>1</sup>H-<sup>1</sup>H COSY spectrum of 1-[(6*R*)-5,6-Dihydro-4,6-dipentyl-2*H*-1,2,3-oxadiazin-2-yl]-3-hydroxypropan-1-one (**1**) in CDCl<sub>3</sub>.

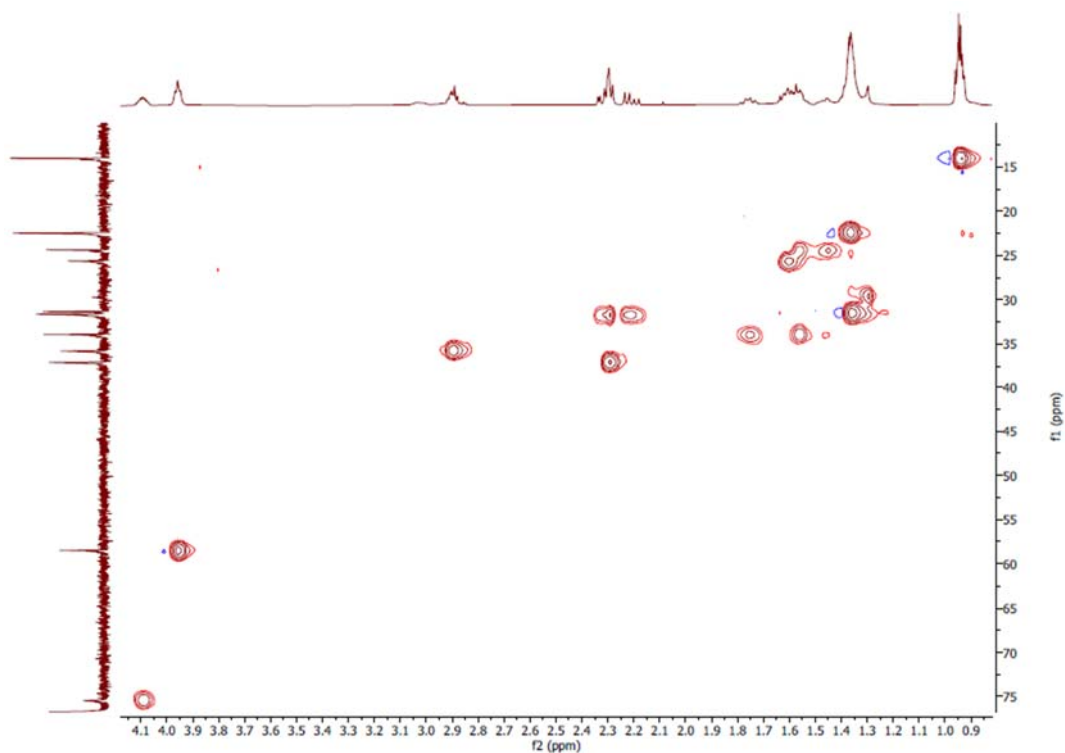

- **Figure S13.**  $^1\text{H}$ - $^{13}\text{C}$  HSQC spectrum of 1-[(6*R*)-5,6-Dihydro-4,6-dipentyl-2*H*-1,2,3-oxadiazin-2-yl]-3-hydroxypropan-1-one (**1**) in  $\text{CDCl}_3$ .

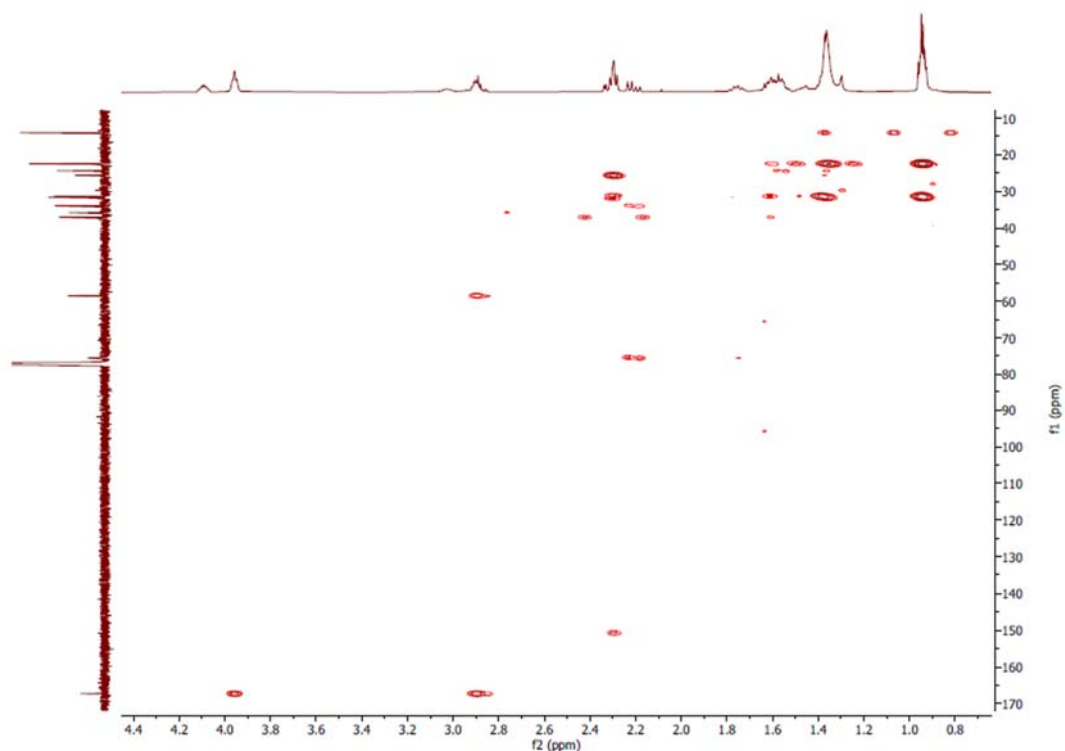

- **Figure S14.**  $^1\text{H}$ - $^{13}\text{C}$  HMBC spectrum of 1-[(6*R*)-5,6-Dihydro-4,6-dipentyl-2*H*-1,2,3-oxadiazin-2-yl]-3-hydroxypropan-1-one (**1**) in  $\text{CDCl}_3$ .

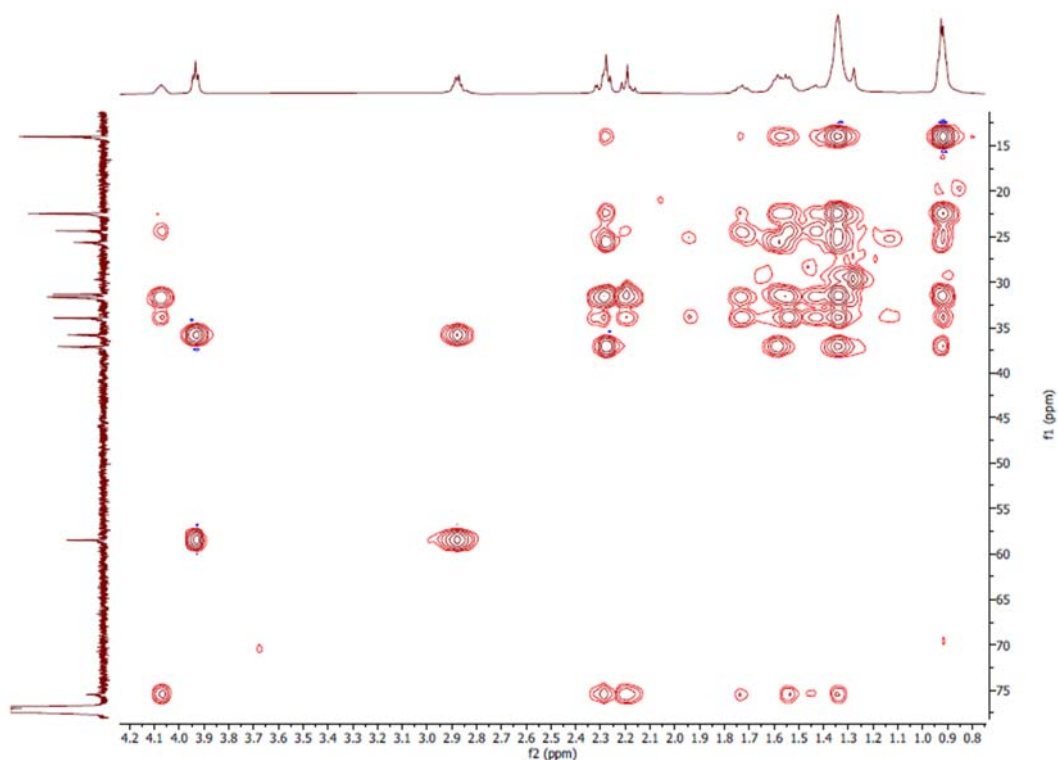

- **Figure S15.**  $^1\text{H}$ - $^{13}\text{C}$  HSQC-TOCSY spectrum of 1-[(6*R*)-5,6-Dihydro-4,6-dipentyl-2*H*-1,2,3-oxadiazin-2-yl]-3-hydroxypropan-1-one (**1**) in  $\text{CDCl}_3$ .

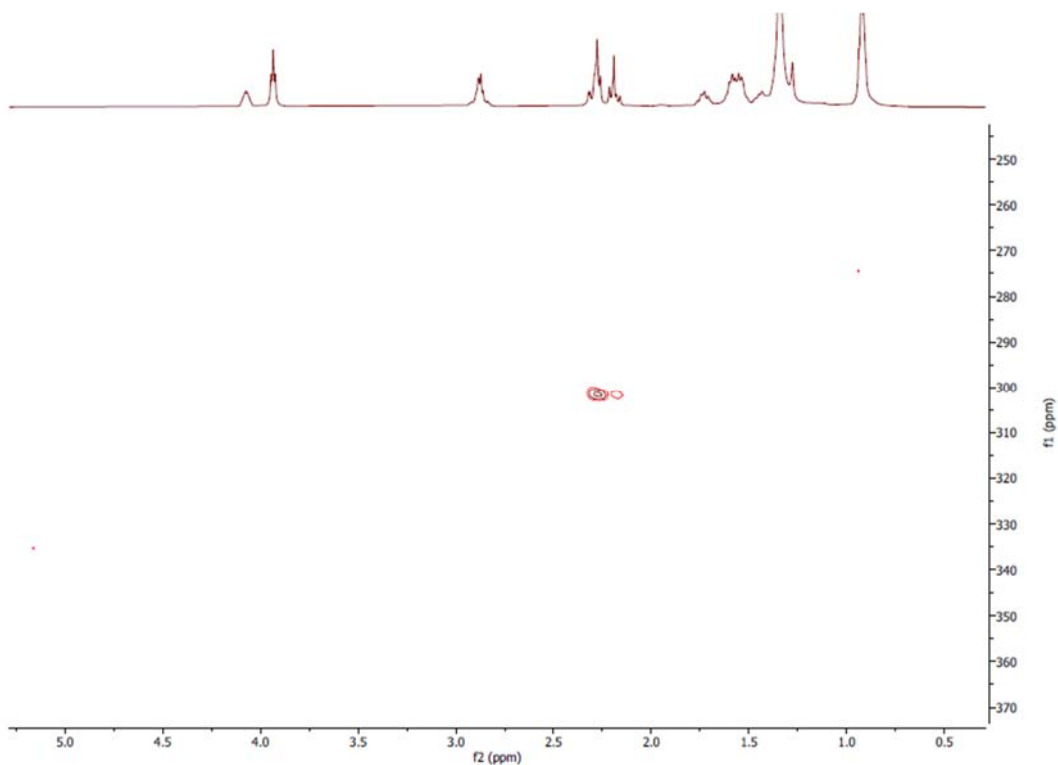

- **Figure S16.**  $^1\text{H}$ - $^{15}\text{N}$  HMBC spectrum of 1-[(6*R*)-5,6-Dihydro-4,6-dipentyl-2*H*-1,2,3-oxadiazin-2-yl]-3-hydroxypropan-1-one (**1**) in  $\text{CDCl}_3$ .

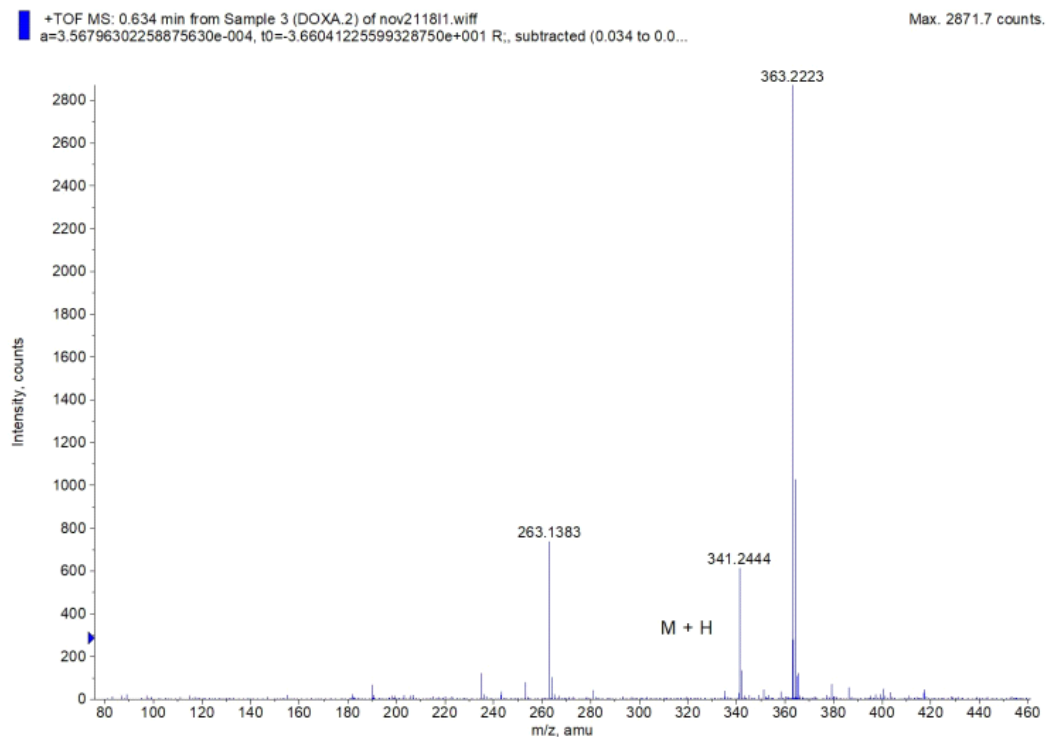

- **Figure S17.** HRESIMS spectrum of 3-[(6R)-5,6-Dihydro-4,6-dipentyl-2H-1,2,3-oxadiazin-2-yl]-3-oxopropyl acetate (**2**).

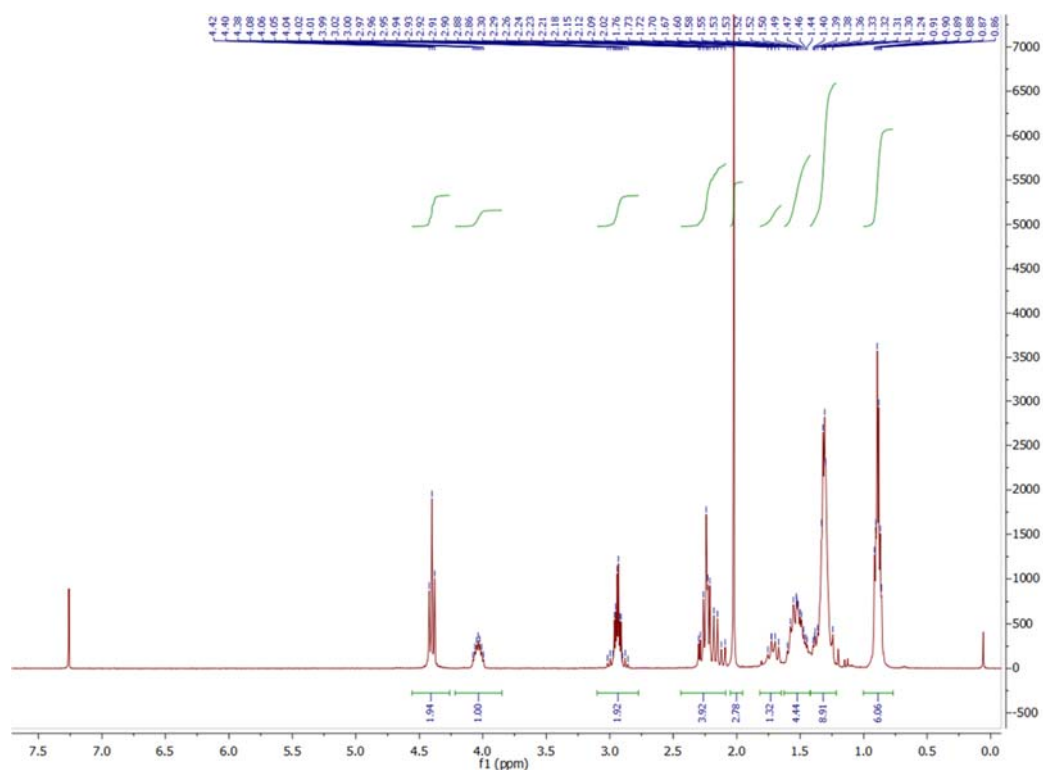

- **Figure S18.** <sup>1</sup>H NMR spectrum of 3-[(6R)-5,6-Dihydro-4,6-dipentyl-2H-1,2,3-oxadiazin-2-yl]-3-oxopropyl acetate (**2**) in CDCl<sub>3</sub> 300 MHz.

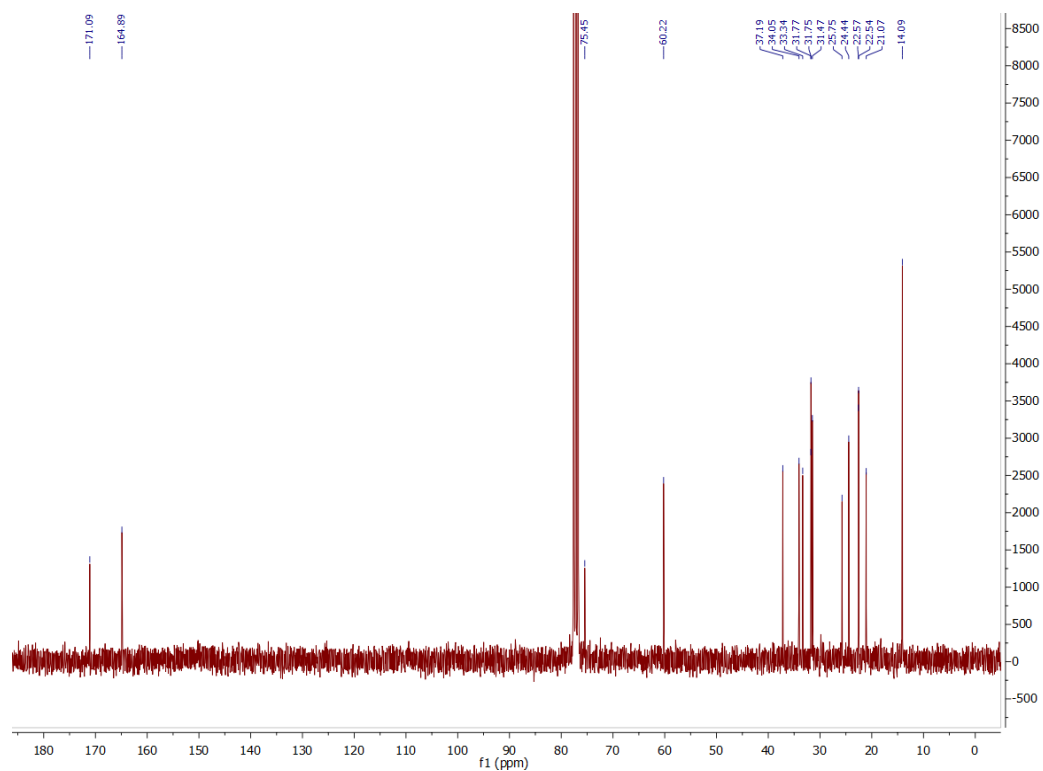

- **Figure S19.**  $^{13}\text{C}$  NMR spectrum of 3-[(6*R*)-5,6-Dihydro-4,6-dipentyl-2*H*-1,2,3-oxadiazin-2-yl]-3-oxopropyl acetate (**2**) in  $\text{CDCl}_3$  75 MHz.

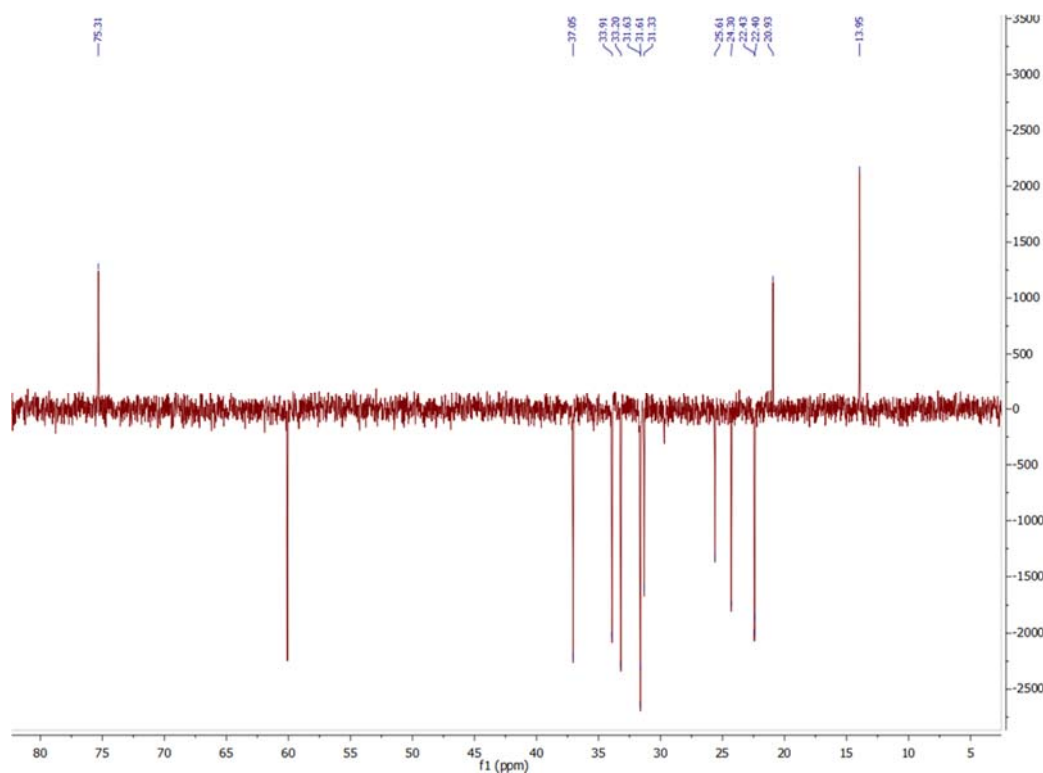

- **Figure S20.** DEPT-135 spectrum of 3-[(6*R*)-5,6-Dihydro-4,6-dipentyl-2*H*-1,2,3-oxadiazin-2-yl]-3-oxopropyl acetate (**2**) in  $\text{CDCl}_3$  75 MHz.

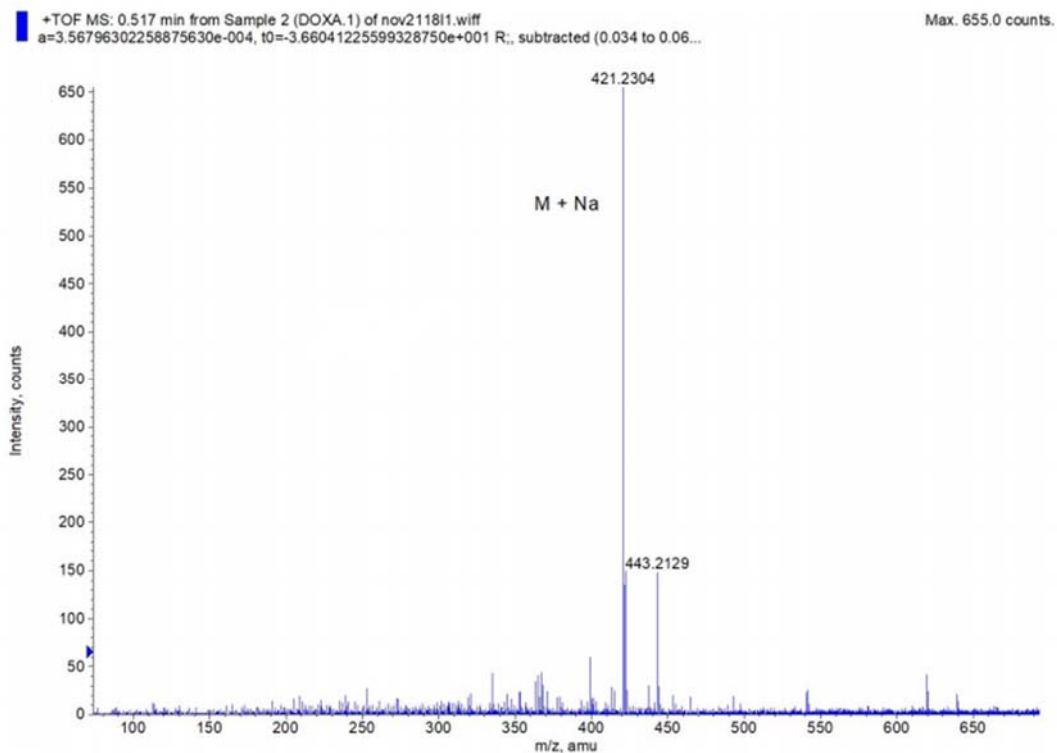

- **Figure S21.** HRESIMS spectrum of 4-{3-[(6*R*)-5,6-Dihydro-4,6-dipentyl-2*H*-1,2,3-oxadiazin-2-yl]-3-oxopropoxy}-4-oxobutanoic acid (**3**).

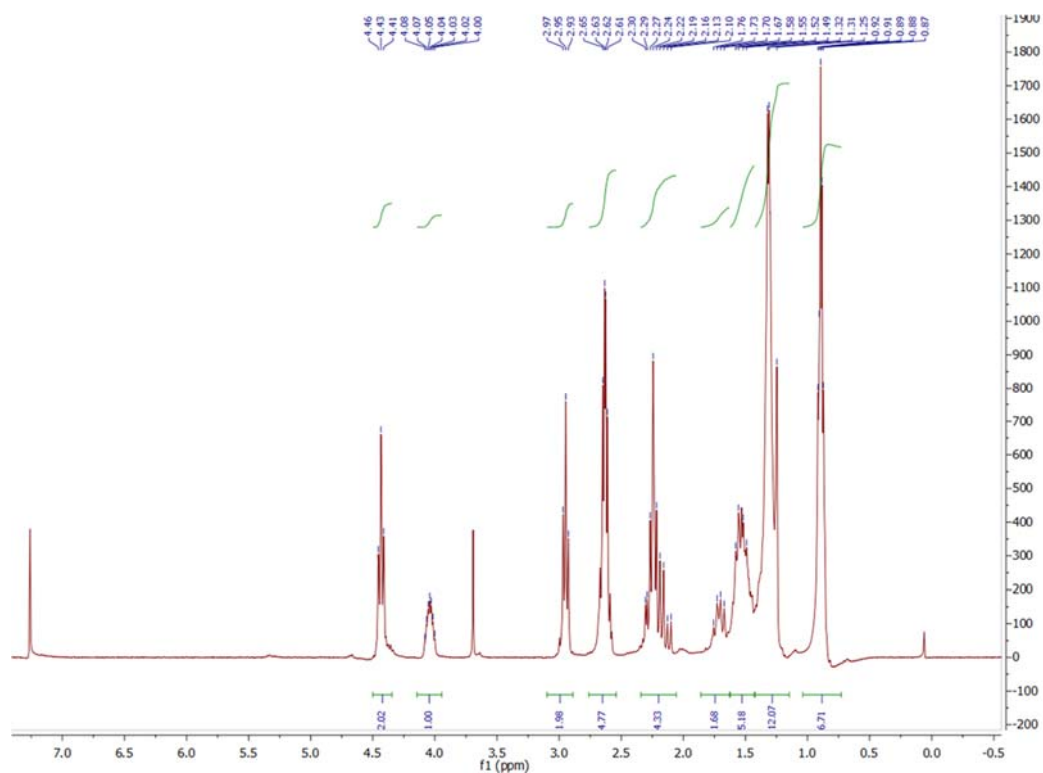

- **Figure S22.** <sup>1</sup>H NMR spectrum of 4-{3-[(6*R*)-5,6-Dihydro-4,6-dipentyl-2*H*-1,2,3-oxadiazin-2-yl]-3-oxopropoxy}-4-oxobutanoic acid (**3**) in CDCl<sub>3</sub> 300 MHz.

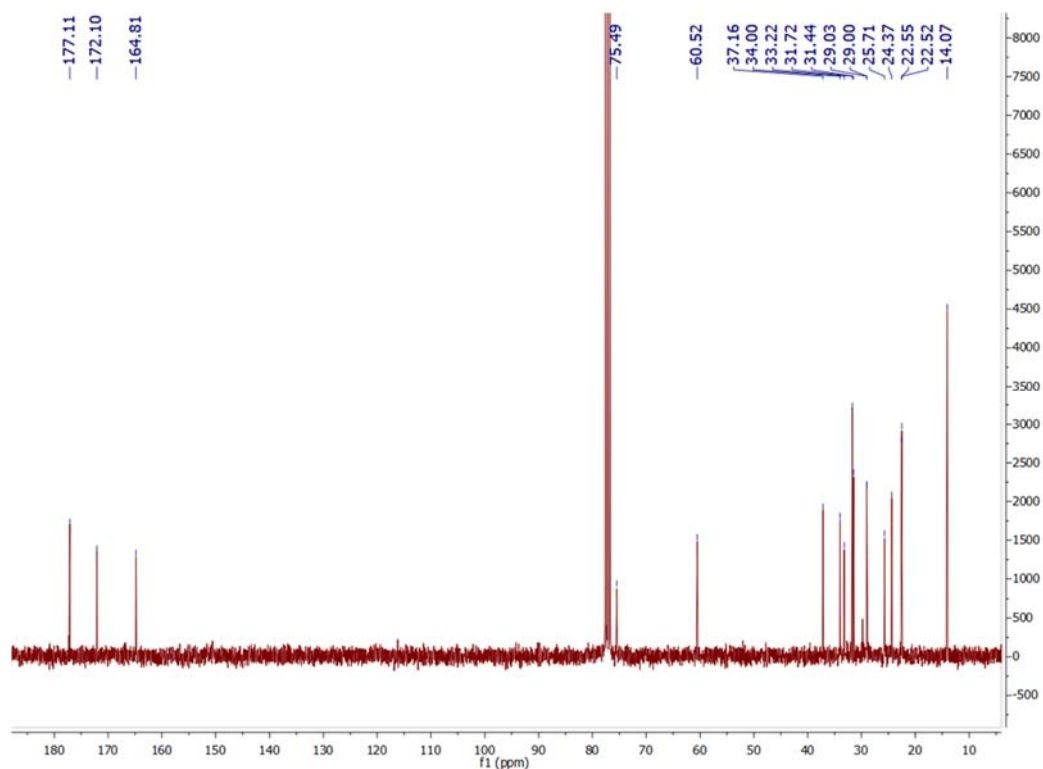

- **Figure S23.**  $^{13}\text{C}$  NMR spectrum of 4-{3-[(6*R*)-5,6-Dihydro-4,6-dipentyl-2*H*-1,2,3-oxadiazin-2-yl]-3-oxopropoxy}-4-oxobutanoic acid (**3**) in  $\text{CDCl}_3$  75 MHz.

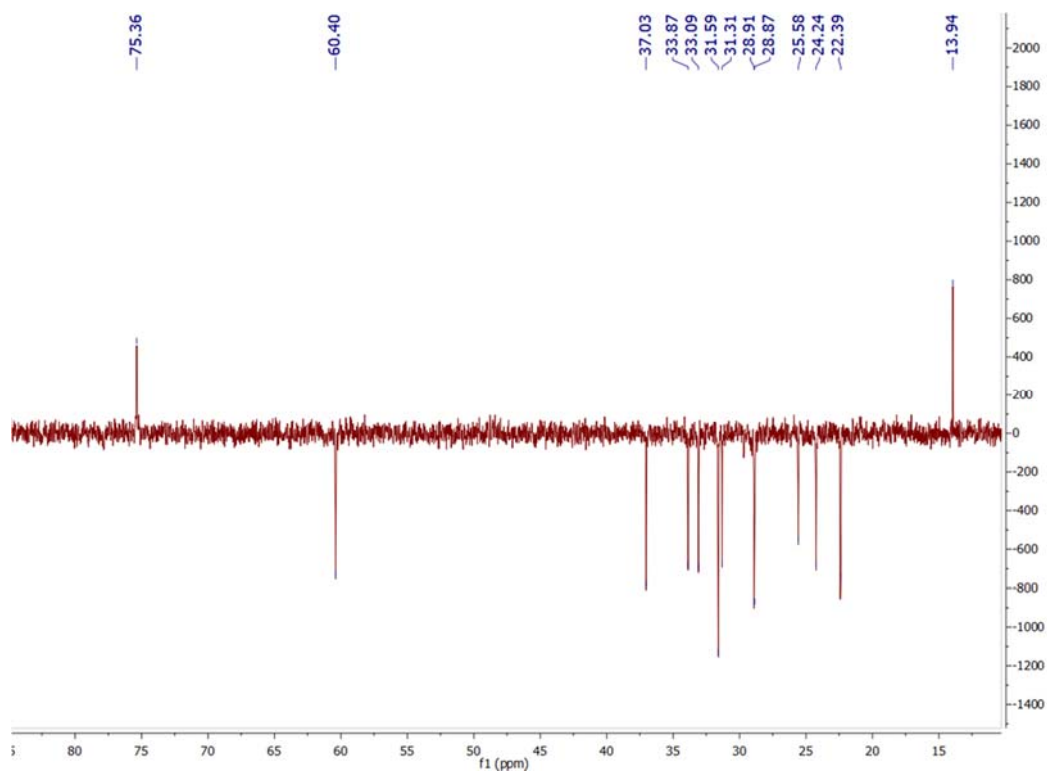

- **Figure S24.** DEPT-135 spectrum of 4-{3-[(6*R*)-5,6-Dihydro-4,6-dipentyl-2*H*-1,2,3-oxadiazin-2-yl]-3-oxopropoxy}-4-oxobutanoic acid (**3**) in  $\text{CDCl}_3$  75 MHz.



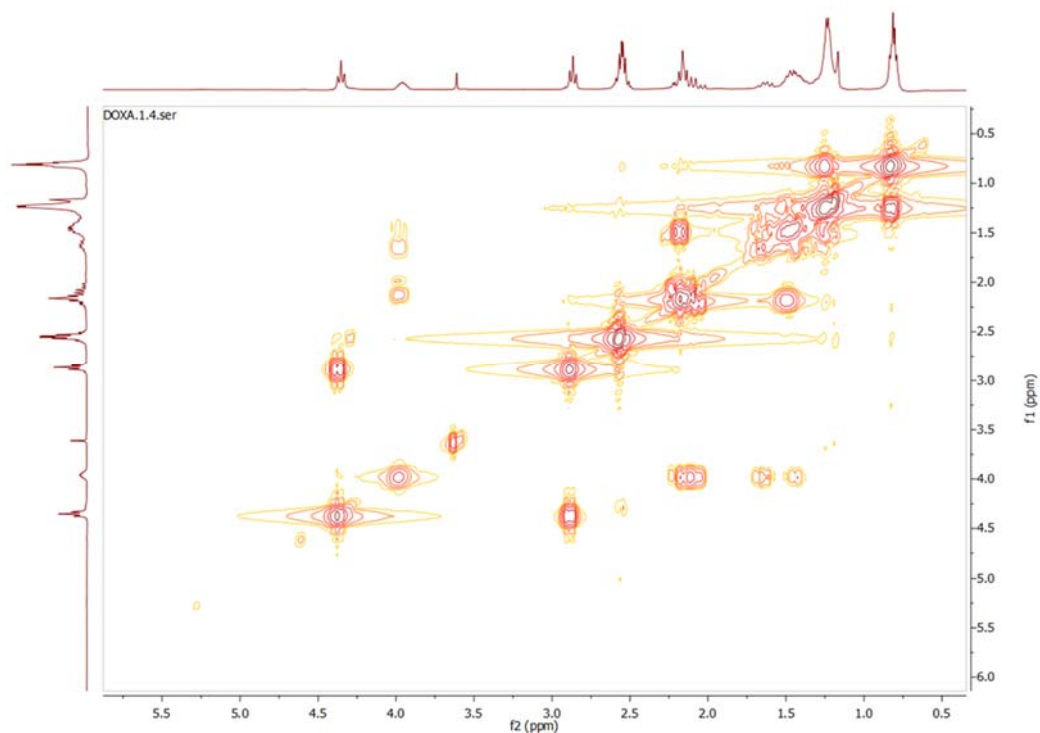

- **Figure S25.**  $^1\text{H}$ - $^1\text{H}$  COSY spectrum of 4-{3-[(6*R*)-5,6-Dihydro-4,6-dipentyl-2*H*-1,2,3-oxadiazin-2-yl]-3-oxopropoxy}-4-oxobutanoic acid (**3**) in  $\text{CDCl}_3$ .

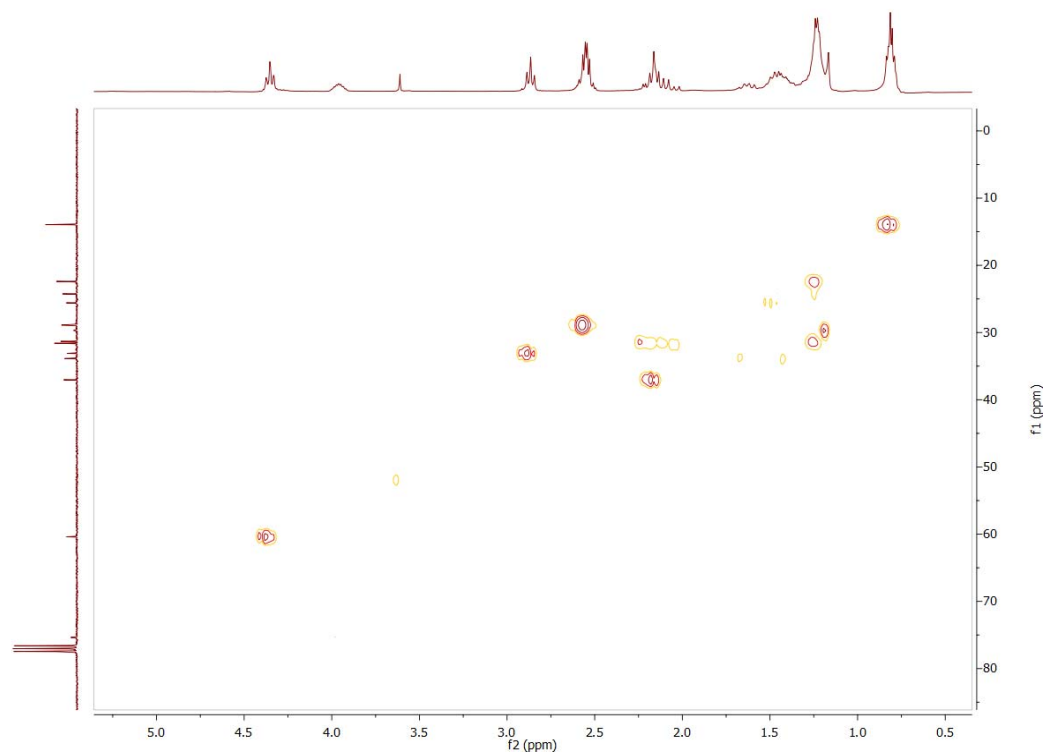

- **Figure S26.**  $^1\text{H}$ - $^{13}\text{C}$  HSQC spectrum of 4-{3-[(6*R*)-5,6-Dihydro-4,6-dipentyl-2*H*-1,2,3-oxadiazin-2-yl]-3-oxopropoxy}-4-oxobutanoic acid (**3**) in  $\text{CDCl}_3$ .

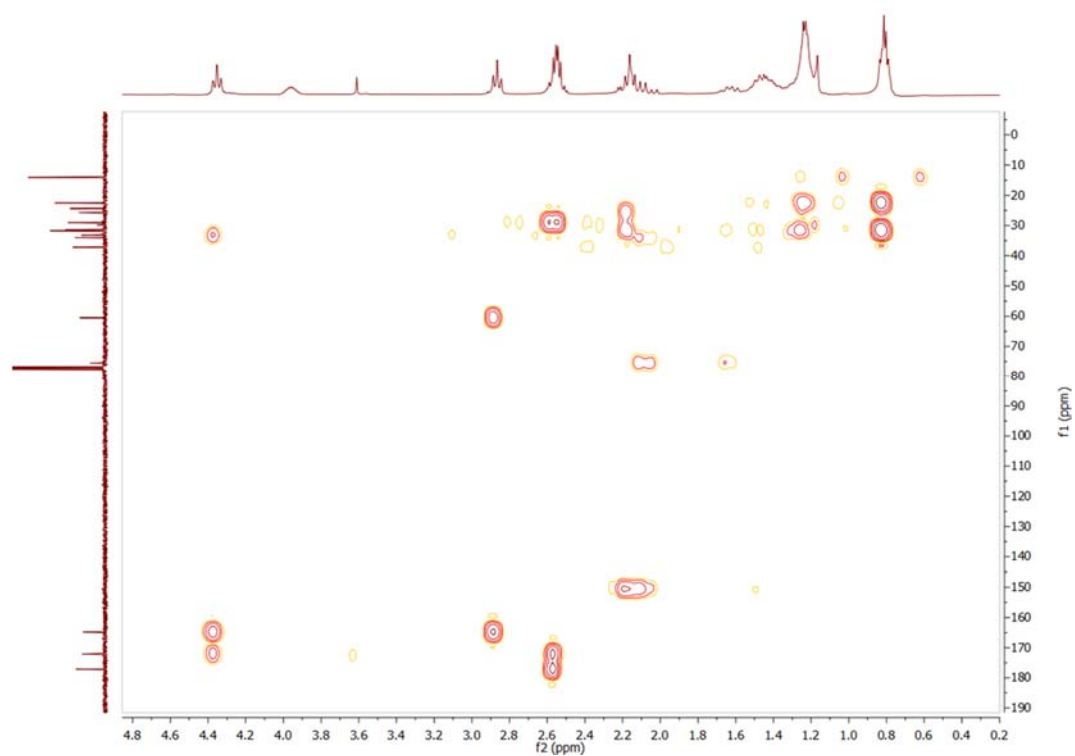

- **Figure S27.**  $^1\text{H}$ - $^{13}\text{C}$  HMBC spectrum of 4-{3-[(*6R*)-5,6-Dihydro-4,6-dipentyl-2*H*-1,2,3-oxadiazin-2-yl]-3-oxopropoxy}-4-oxobutanoic acid (**3**) in  $\text{CDCl}_3$ .
